# Supplementary material for: Enhanced UV detection performance of a CdZnTe-based photodetector through surface polishing treatments
Source: Royal Society of Chemistry journal article supplement (doi:10.1039/d0tc05688j), 2021-01-01
Supplement: d0tc05688j1.pdf [file d0tc05688j1.pdf]

## Supplementary Information

### Enhanced UV detection performance of CdZnTe-based photodetector through surface polishing treatment

Zilong Zhang<sup>1</sup>, Keyun Gu<sup>1</sup>, Fan Yang<sup>1</sup>, Jian Huang<sup>1,\*</sup>, Ke Tang<sup>1</sup>, Yue Shen<sup>1</sup>, Jieyu Zhang<sup>1</sup>,

Meiyong Liao<sup>2,\*</sup> and Linjun Wang<sup>1</sup>

<sup>1</sup> School of Materials Science and Engineering, Shanghai University, Shanghai 200444, PR China

<sup>2</sup> Research Center for Functional Materials, National Institute for Materials Sciences (NIMS), Namiki 1-

1, Tsukuba, Ibaraki 305-0044, Japan

Correspondence should be addressed to Jian Huang\* ([jianhuang@shu.edu.cn](mailto:jianhuang@shu.edu.cn)) or Meiyong Liao\*

([meiyong.liao@nims.go.jp](mailto:meiyong.liao@nims.go.jp))

## 1. The thickness of the CZT films

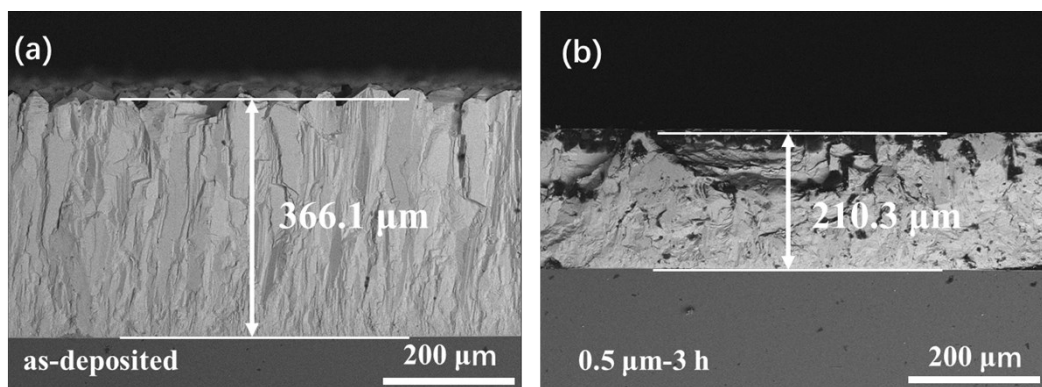

**Fig. S1** SEM images of cross-sections of (a) as-deposited and (b) as-MP CZT films.

## 2. Crystal structure parameters of as-chemical etching-polishing (CP) CZT films etched in various concentrations of Br-MeOH based on the XRD patterns.

**Table S1** XRD data of as-CP CZT films chemical etching in different concentrations of Br-MeOH solution

| Br-MeOH concentration | 2θ (°) | d (Å) | FWHM (°) | Grain size (nm) |
|-----------------------|--------|-------|----------|-----------------|
| 1%                    | 23.76  | 3.74  | 0.186    | 43.65           |
| 2%                    | 23.84  | 3.73  | 0.184    | 44.13           |
| 3%                    | 23.68  | 3.75  | 0.187    | 43.41           |
| 4%                    | 23.64  | 3.76  | 0.184    | 44.11           |
| 5%                    | 23.60  | 3.77  | 0.192    | 42.27           |

### 3. EDS data of as-CP CZT films in Br-MeOH solution with different concentrations

**Table S2** EDS data of as-CP CZT films with different concentrations of Br-MeOH

| Br-MeOH concentration | Cd (at, %) | Te (at, %) | Zn (at, %) |
|-----------------------|------------|------------|------------|
| 1%                    | 48.68      | 49.54      | 1.78       |
| 2%                    | 48.78      | 49.70      | 1.52       |
| 3%                    | 48.74      | 50.28      | 0.99       |
| 4%                    | 48.41      | 50.51      | 1.08       |
| 5%                    | 45.79      | 52.01      | 2.20       |

### 4. Crystal structure parameters of as-CP CZT films etched in 2%-Br-MeOH with varying etching duration.

**Table S3** XRD data of as-CP CZT films chemical etching in 2%-Br-MeOH solution

| Etching time (min) | $2\theta$ (°) | d (Å) | FWHM (°) | Grain size (nm) |
|--------------------|---------------|-------|----------|-----------------|
| 1                  | 23.84         | 3.73  | 0.184    | 44.13           |
| 3                  | 23.84         | 3.73  | 0.199    | 40.80           |
| 5                  | 23.74         | 3.74  | 0.197    | 41.20           |
| 7                  | 23.62         | 3.76  | 0.185    | 43.87           |

**5. EDS data of as-MP CZT films in 2%-Br-MeOH solution with different etching times**

**Table S4** EDS data of as-CP CZT films after chemical etching polishing in 2%-Br-MeOH with different durations

| Etching time (min) | Cd (at, %) | Te (at, %) | Zn (at, %) |
|--------------------|------------|------------|------------|
| 1                  | 48.78      | 49.70      | 1.52       |
| 3                  | 48.29      | 50.60      | 1.11       |
| 5                  | 48.37      | 50.63      | 1.00       |
| 7                  | 45.83      | 51.97      | 2.20       |

**6. Detector performance of CZT-based detector with the UV illumination on and off.**

**Table S5** the rise time and decay time of CZT-based detectors under varying surface treatments.

| Detector                                              | Rise time (s) | Decay time (s) |
|-------------------------------------------------------|---------------|----------------|
| As-grown                                              | 0.78          | 1.10           |
| MP                                                    | 0.52          | 0.88           |
| MP+CP                                                 | 0.35          | 0.48           |
| MP+CP+NH <sub>4</sub> N/H <sub>2</sub> O <sub>2</sub> | 0.21          | 0.40           |
| MP+CP+ZnS                                             | 0.27          | 0.46           |
